# Supplementary material
Source: publisher figshare collection journal article supplement (https://acs.figshare.com/ndownloader/files/5975751)
Supplement: Supplementary file 1 [file 5975751]

# Exploration of $A_2VO(SO_4)_2$ ( $A = Li, Na$ ) as Electrode for Li-ion and Na-ion Batteries

Meiling Sun<sup>a,b</sup>, Gwenaëlle Rousse<sup>a,b,c</sup>, Matthieu Saubanère<sup>c,d</sup>, Daniel Dalla Corte<sup>a</sup> and Jean-Marie Tarascon<sup>a,b,c,\*</sup>

<sup>a</sup>FRE 3677 “Chimie du Solide et Energie”, Collège de France, 11 Place Marcelin Berthelot, 75231 Paris Cedex 05, France

<sup>b</sup>Sorbonne Universités - UPMC Univ Paris 06, 4 Place Jussieu, F-75005 Paris, France

<sup>c</sup>Réseau sur le Stockage Electrochimique de l’Energie (RS2E), FR CNRS 3459, France

<sup>d</sup>ICGM Institut Charles Gerhardt - CNRS and Université Montpellier, Place Eugène Bataillon, 34095 Montpellier, France

## SUPPORTING INFORMATION

**Table S1.** Structural parameters for  $\text{Na}_2\text{VO}(\text{SO}_4)_2$  deduced from the Rietveld refinement of the synchrotron X-ray diffraction patterns at 300 K.

| $\text{Na}_2\text{VO}(\text{SO}_4)_2$ Space Group: $P 2_1 2_1 2_1$<br>$a = 6.310020(13) \text{ \AA}$ , $b = 6.807419(13) \text{ \AA}$ , $c = 16.69296(3) \text{ \AA}$<br>$V = 717.045(3) \text{ \AA}^3$ , density = $2.826 \text{ g/cm}^3$ , $Z = 4$ |              |             |             |             |           |                     |
|------------------------------------------------------------------------------------------------------------------------------------------------------------------------------------------------------------------------------------------------------|--------------|-------------|-------------|-------------|-----------|---------------------|
| Atom                                                                                                                                                                                                                                                 | Wyckoff site | X           | y           | z           | Occupancy | B( $\text{\AA}^2$ ) |
| Na1                                                                                                                                                                                                                                                  | 4a           | 0.6744(4)   | 0.1511(4)   | 0.59123(17) | 1         | 3.12(6)             |
| Na2                                                                                                                                                                                                                                                  | 4a           | 0.3706(3)   | 0.1083(4)   | 0.23909(13) | 1         | 1.54(5)             |
| V                                                                                                                                                                                                                                                    | 4a           | 0.53277(17) | 0.14911(14) | 0.91053(6)  | 1         | 0.71(2)             |
| S1                                                                                                                                                                                                                                                   | 4a           | 0.0340(2)   | 0.0853(2)   | 0.93224(9)  | 1         | 0.99(3)             |
| S2                                                                                                                                                                                                                                                   | 4a           | 0.8567(2)   | 0.1042(2)   | 0.25017(9)  | 1         | 0.88(3)             |
| O1                                                                                                                                                                                                                                                   | 4a           | 0.2166(5)   | 0.2001(4)   | 0.9056(2)   | 1         | 0.21(7)             |
| O2                                                                                                                                                                                                                                                   | 4a           | 0.5236(6)   | 0.4012(5)   | 0.97815(19) | 1         | 1.01(7)             |
| O3                                                                                                                                                                                                                                                   | 4a           | 0.5104(6)   | 0.3592(5)   | 0.81536(20) | 1         | 0.93(7)             |
| O4                                                                                                                                                                                                                                                   | 4a           | 0.8505(5)   | 0.1931(5)   | 0.8969(2)   | 1         | 0.92(7)             |
| O5                                                                                                                                                                                                                                                   | 4a           | 0.5157(5)   | -0.0493(5)  | 0.8226(2)   | 1         | 0.94(7)             |
| O6                                                                                                                                                                                                                                                   | 4a           | 0.5374(5)   | -0.0099(4)  | 0.9815(2)   | 1         | 1.19(8)             |
| O7                                                                                                                                                                                                                                                   | 4a           | 0.0478(5)   | -0.1130(5)  | 0.9078(2)   | 1         | 1.46(8)             |
| O8                                                                                                                                                                                                                                                   | 4a           | 0.2722(6)   | -0.2274(5)  | 0.2331(2)   | 1         | 0.84(8)             |
| O9                                                                                                                                                                                                                                                   | 4a           | -0.2747(5)  | -0.0647(5)  | 0.22501(19) | 1         | 0.51(7)             |
| Reliability parameters: $\chi^2 = 5.96$ ; Bragg R-factor = 5.64%                                                                                                                                                                                     |              |             |             |             |           |                     |

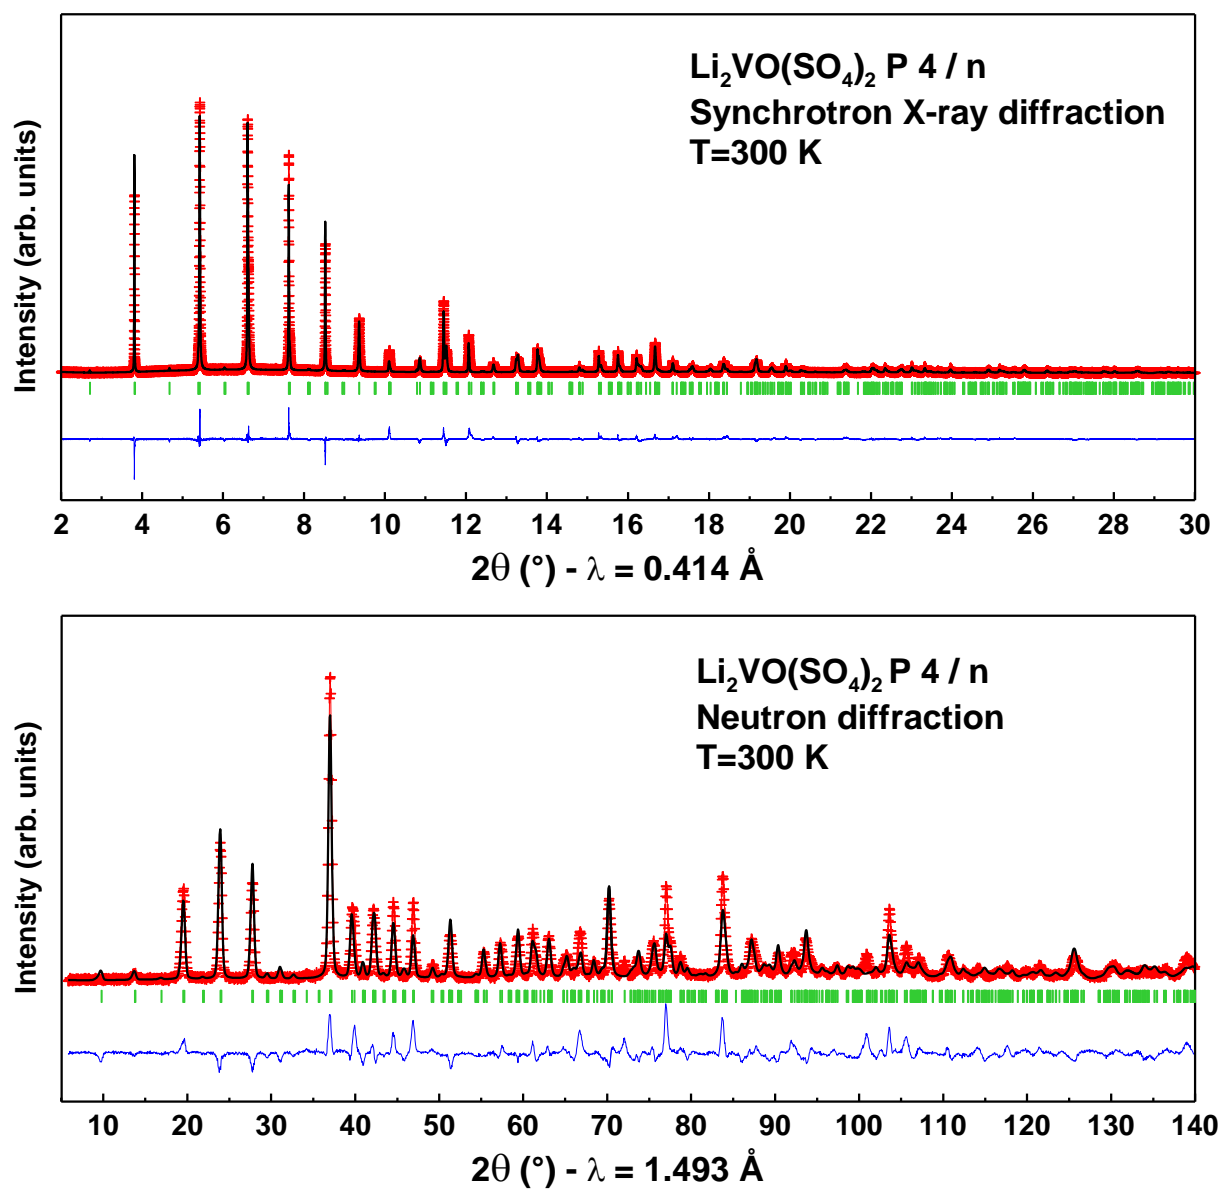

**Figure S1.** Unsatisfactory Rietveld refinement of synchrotron and neutron diffraction patterns obtained for  $\text{Li}_2\text{VO}(\text{SO}_4)_2$  ( $T=300$  K) using the structure model of  $\text{Li}_4\text{VO}(\text{PO}_4)_2$  (space group:  $P 4/n$ ). The red crosses, black continuous line and bottom blue line represent the observed, calculated, and difference patterns, respectively. Vertical green tick bars mark the Bragg reflections.

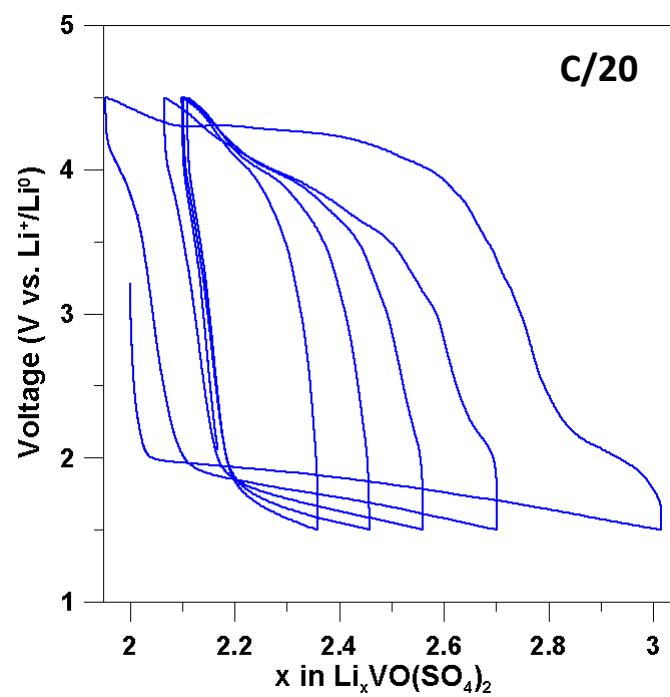

**Figure S2.** Voltage – composition curve for  $\text{Li}_2\text{VO}(\text{SO}_4)_2$  upon discharge with 1  $\text{Li}^+$  fixed to be inserted in the first cycle.

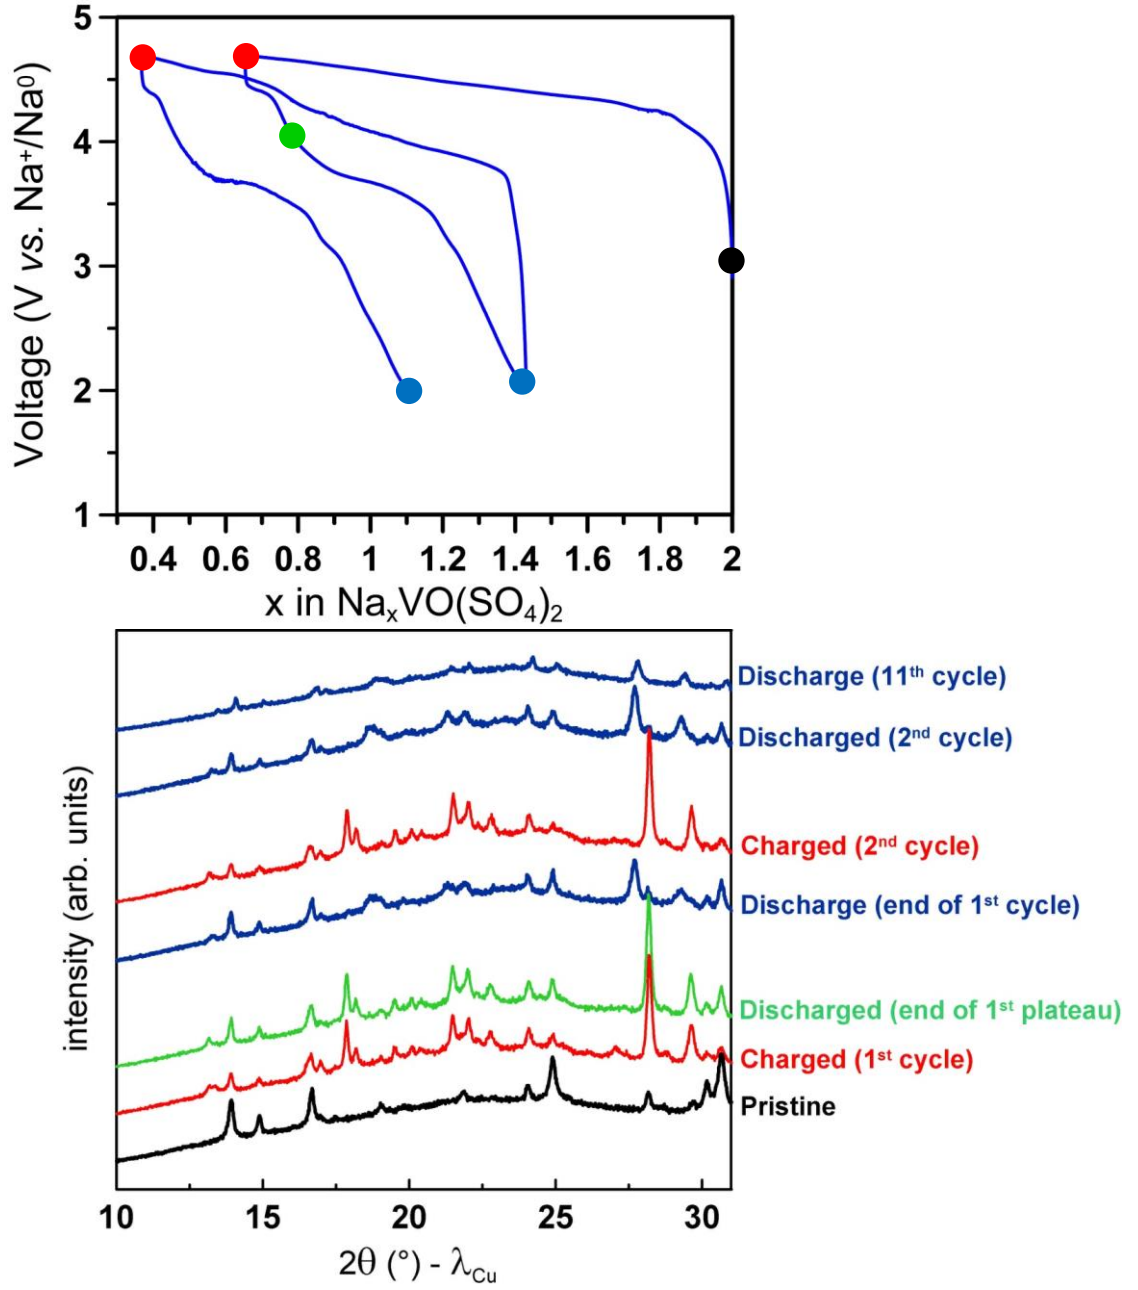

**Figure S3.** In situ XRD patterns recorded for a Na<sub>2</sub>VO(SO<sub>4</sub>)<sub>2</sub>/Na cell behind a Be window while the cell is charged to 4.7 V (lower panel), the voltage–composition curve is shown (upper panel). The black pattern corresponds to the pristine phase, the red one refers to the fully oxidized sample (for both 1<sup>st</sup> and 2<sup>nd</sup> cycle), the green pattern refers to reduced sample at the end of 1<sup>st</sup> plateau, and the blue patterns were recorded at the subsequent discharge states (for all the 1<sup>st</sup>, 2<sup>nd</sup>, and 11<sup>th</sup> cycles). It indicates a reversible cycling from the 2<sup>nd</sup> cycle of this process.

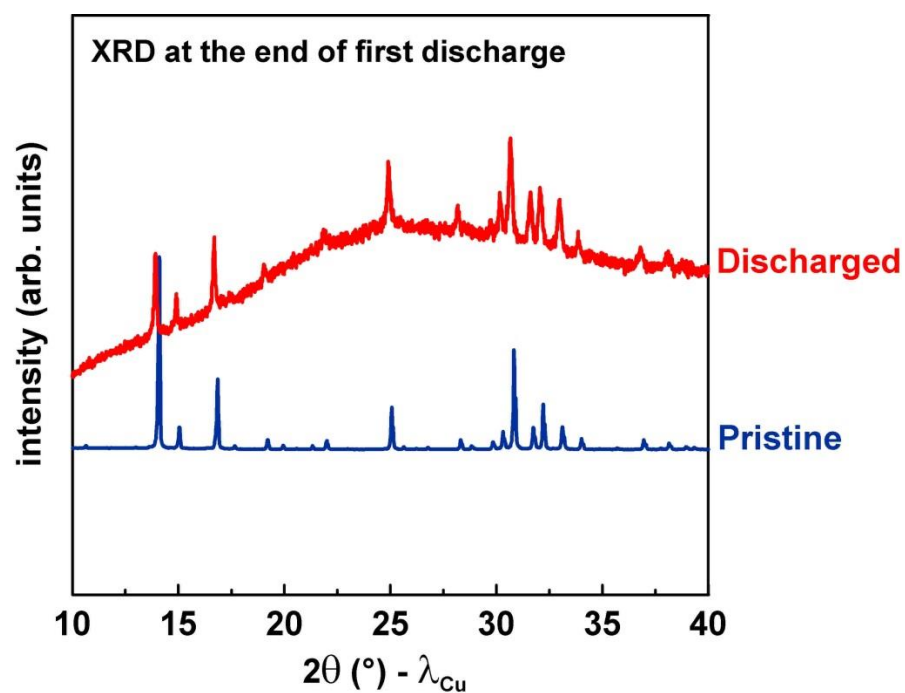

**Figure S4.** X-ray diffraction patterns collected at the end of first discharge of  $\text{Na}_2\text{VO}(\text{SO}_4)_2/\text{Li}$  cell compared to the pristine phase of  $\text{Na}_2\text{VO}(\text{SO}_4)_2$ . Their similar profiles suggest that the  $\text{Na}_2\text{VO}(\text{SO}_4)_2$  structural framework is preserved through the cycling process.

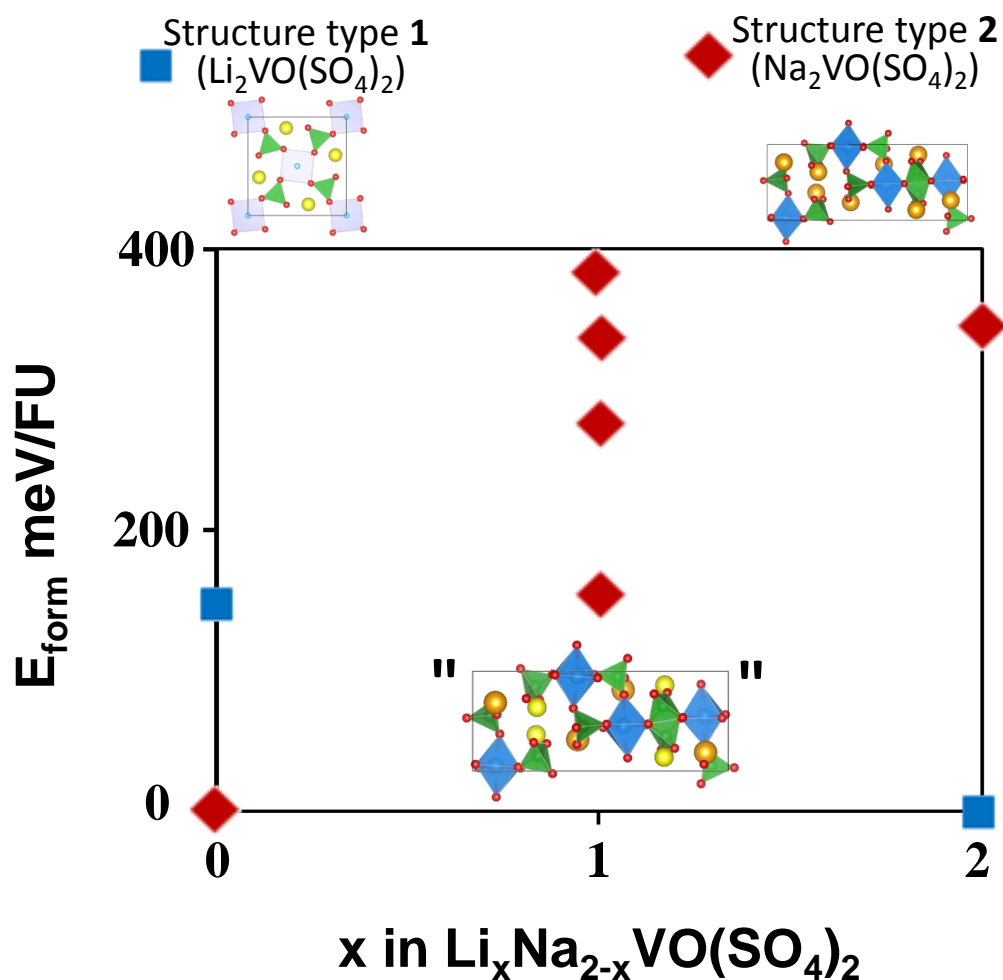

**Figure S5.** We investigate the thermodynamic stability of the Li/Na substitution in the two  $\text{A}_2\text{VO}(\text{SO}_4)_2$  ( $\text{A}=\text{Li}, \text{Na}$ ) structural type.  $x=0$  and  $x=2$  on the  $x$ -axis refer to the stoichiometry  $\text{Na}_2\text{VO}(\text{SO}_4)_2$  and  $\text{Li}_2\text{VO}(\text{SO}_4)_2$  phases that adopts structure type 2 and 1, respectively. As expected, for  $x=0$  (corresponding to the stoichiometry  $\text{Na}_2\text{VO}(\text{SO}_4)_2$ ), the polymorph of structural type 2 (red) is found far more stable than the polymorph of structural type 1 (blue) where all Li were substituted by Na. Similarly, for  $x=2$  this is the opposite, the polymorph of structural type 1 is found far more stable than the polymorph of structural type 2 where all Na were substituted by Li. Going to intermediate stoichiometry ( $x=1$ ) that is  $\text{NaLiVO}(\text{SO}_4)_2$ , the 4 different configurations inequivalent by symmetry, obtained by exchanging Na by Li in the structure type 2, were tested (since this was shown to be experimentally feasible). In all cases we obtain polymorphs having a formation energy above the energy of a "phase segregation" (the 0 reference). Among the 4 polymorphs tested the one close to stabilization is shown. Overall, this suggests that no solid solution is expected thermodynamically for this  $\text{NaLiVO}(\text{SO}_4)_2$  stoichiometry. The energy of zero reference is defined here in as

$$E = x/2 (E_f \text{ of } \text{Li}_2\text{VO}(\text{SO}_4)_2) + (2-x)/2 (E_f \text{ of } \text{Na}_2\text{VO}(\text{SO}_4)_2).$$

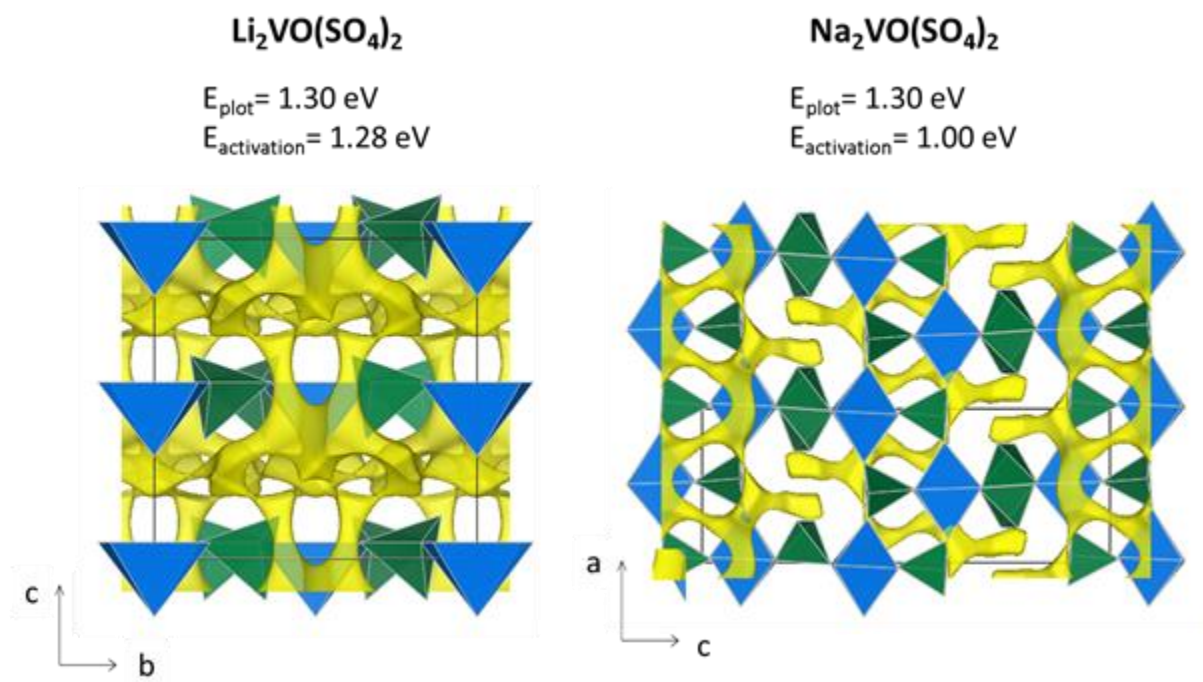

**Figure S6.** Bond valence energy landscape (BVEL) deduced for (a)  $\text{Li}_2\text{VO}(\text{SO}_4)_2$  and (b)  $\text{Na}_2\text{VO}(\text{SO}_4)_2$ . These BVEL were created using the BondStr program available in the FullProf suite,<sup>1</sup> using soft bond valence sum parameters developed by S. Adams.<sup>2</sup> BVEL are obtained from soft-BVS parameters by transforming them valence into energy units, using a Morse-type potential for the attractive part and a screened Coulomb potential for the repulsive part.<sup>3</sup> The probing ion, in our case  $\text{Li}^+$  for  $\text{Li}_2\text{VO}(\text{SO}_4)_2$  and  $\text{Na}^+$  for  $\text{Na}_2\text{VO}(\text{SO}_4)_2$ , is placed in all points of the unit cell and its interaction energy, using the above mentioned potential, is calculated up to a common distance of 10 Å. In the figure,  $\text{SO}_4$  are coloured in green,  $\text{VO}_n$  polyhedra in blue, and the yellow domains correspond to the migration paths for Li/Na in the structures, both plotted using an iso-surface value of 1.30 eV over the minimum energy. The energies leading to an infinitely connected path for Li in  $\text{Li}_2\text{VO}(\text{SO}_4)_2$  or Na in  $\text{Na}_2\text{VO}(\text{SO}_4)_2$  are 1.28 eV and 1.00 eV, respectively (these energies are denoted “activation energies” in the paper).

## REFERENCES

- <sup>1</sup> J. Rodríguez-Carvajal, FullProf Suite, [www.ill.eu/sites/fullprof/](http://www.ill.eu/sites/fullprof/).
- <sup>2</sup> S. Adams, Solid State Ionics, 2006, 177, 1625–1630.
- <sup>3</sup> S. Adams, in Bond Valences, eds. I. D. Brown and K. R. Poeppelmeier, Springer Berlin Heidelberg, 2013, pp. 91–128.
